# Supplementary material
Source: PubMed Central journal article supplement (PMC7507327)

Fig. 3

B

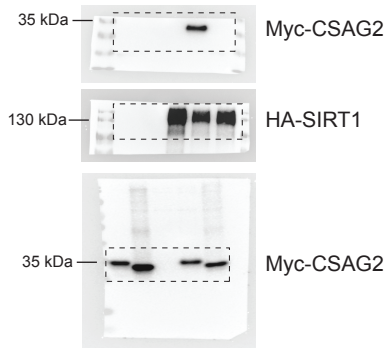

C

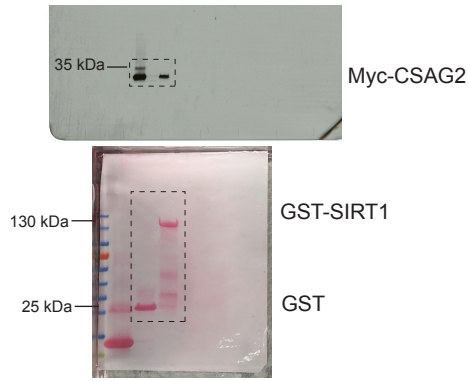

D

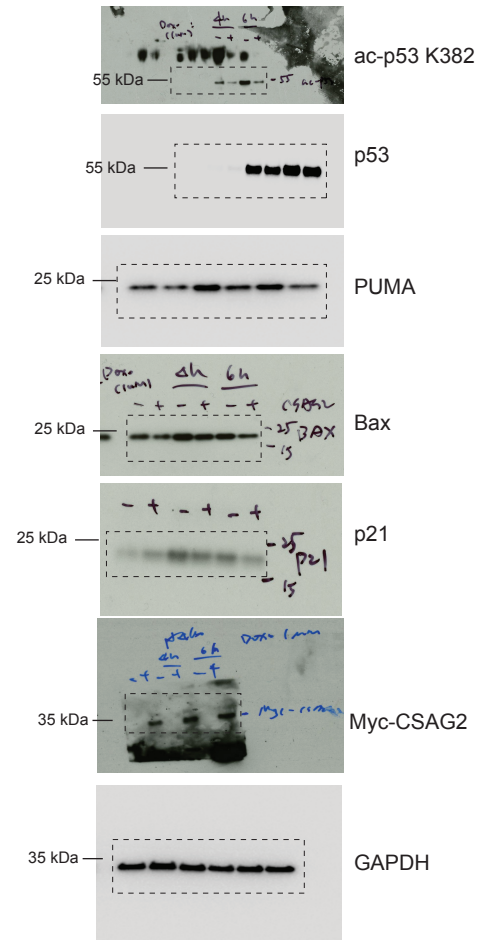

F

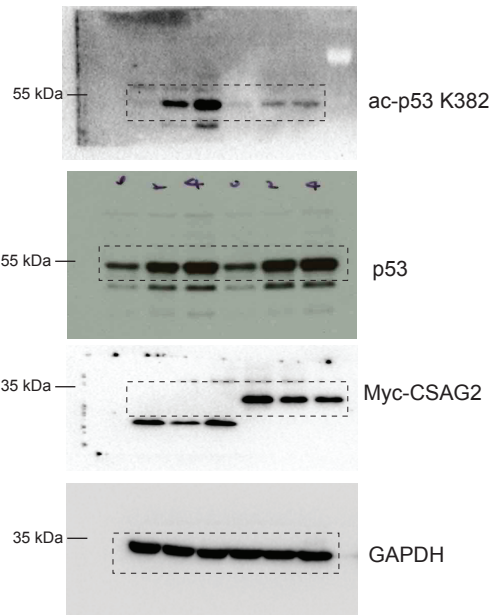

H

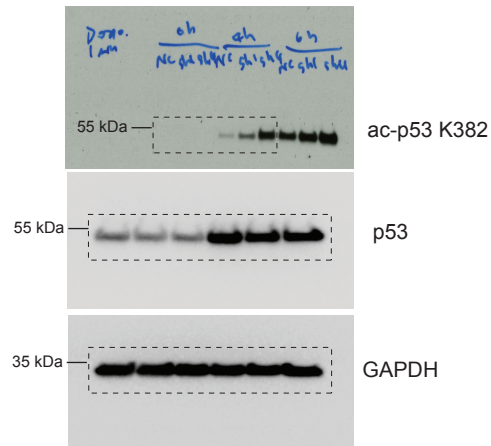

J

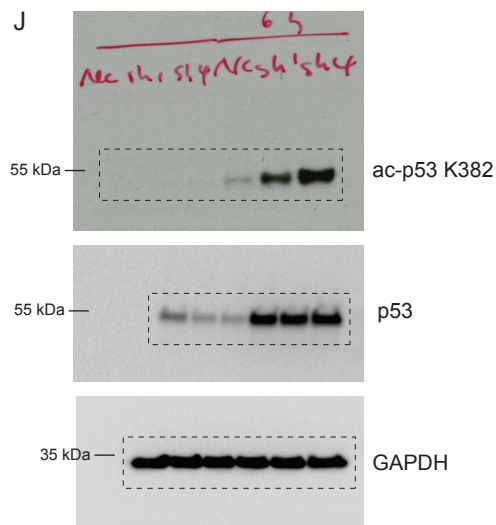

Supplement: EMBR-21-e50912-s003.pdf [file EMBR-21-e50912-s003.pdf]

Fig. 4

A

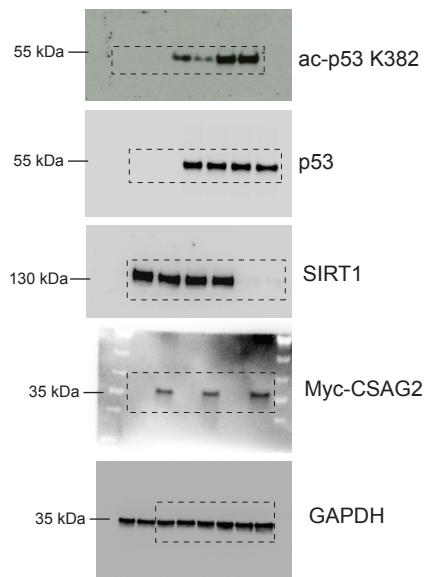

B

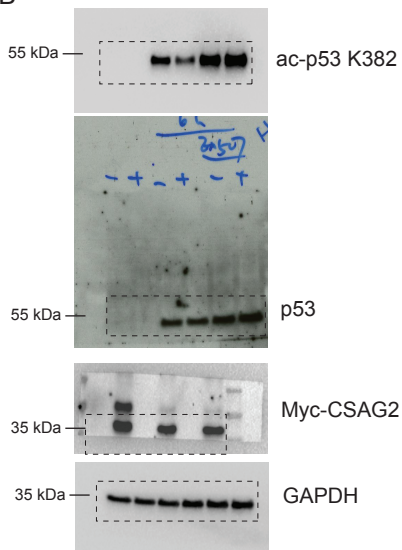

C

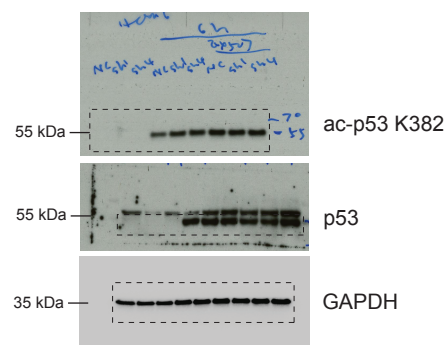

E

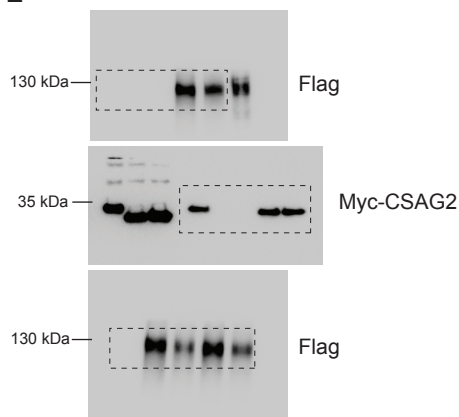

F

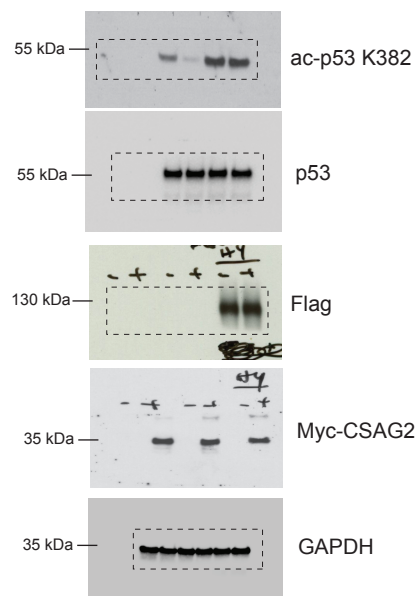

H

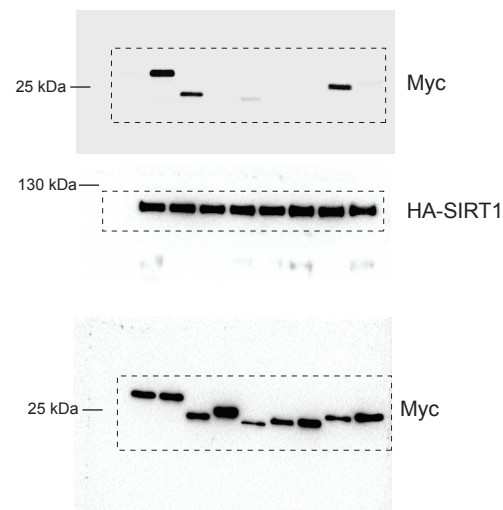

I

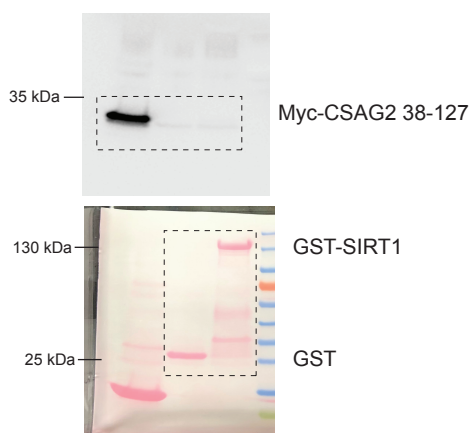

J

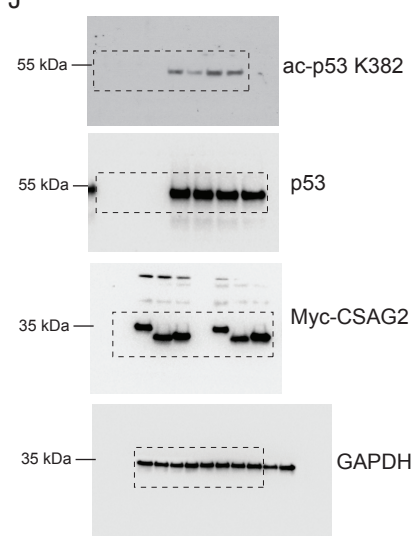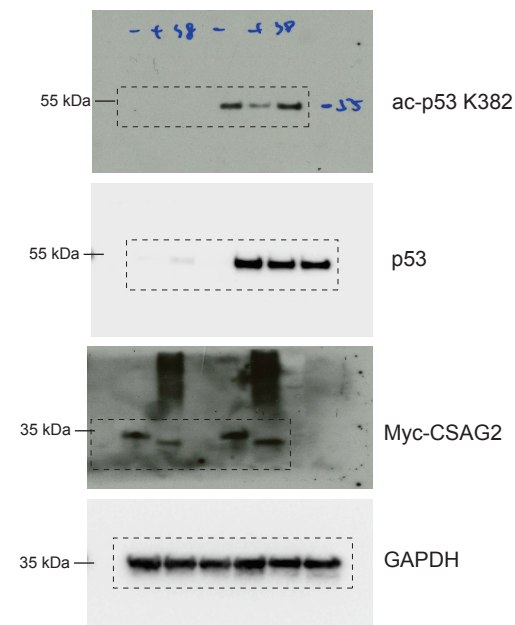

Supplement: EMBR-21-e50912-s004.pdf [file EMBR-21-e50912-s004.pdf]

Fig. 5

E

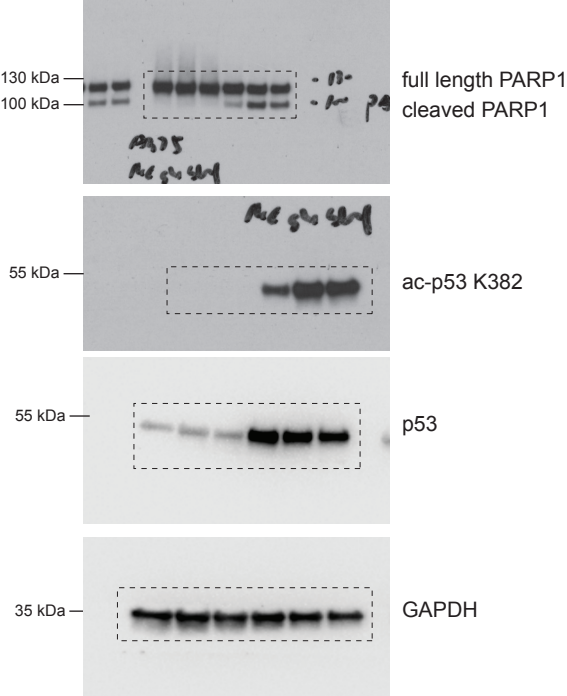

Supplement: EMBR-21-e50912-s005.pdf [file EMBR-21-e50912-s005.pdf]

Fig. 6

A

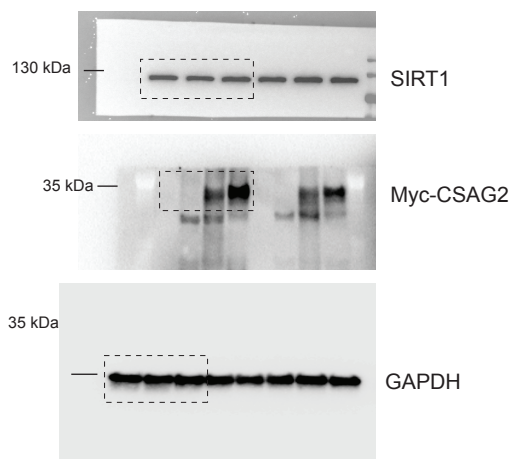

C

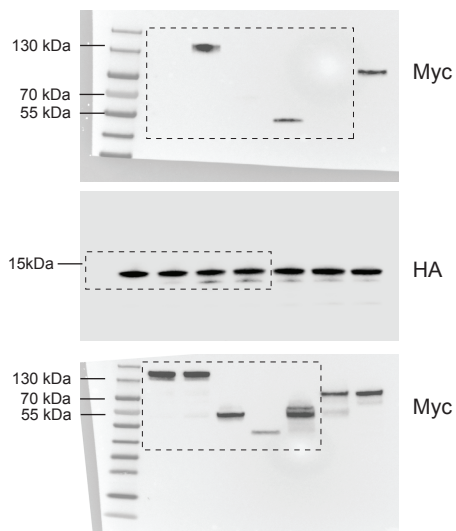

D

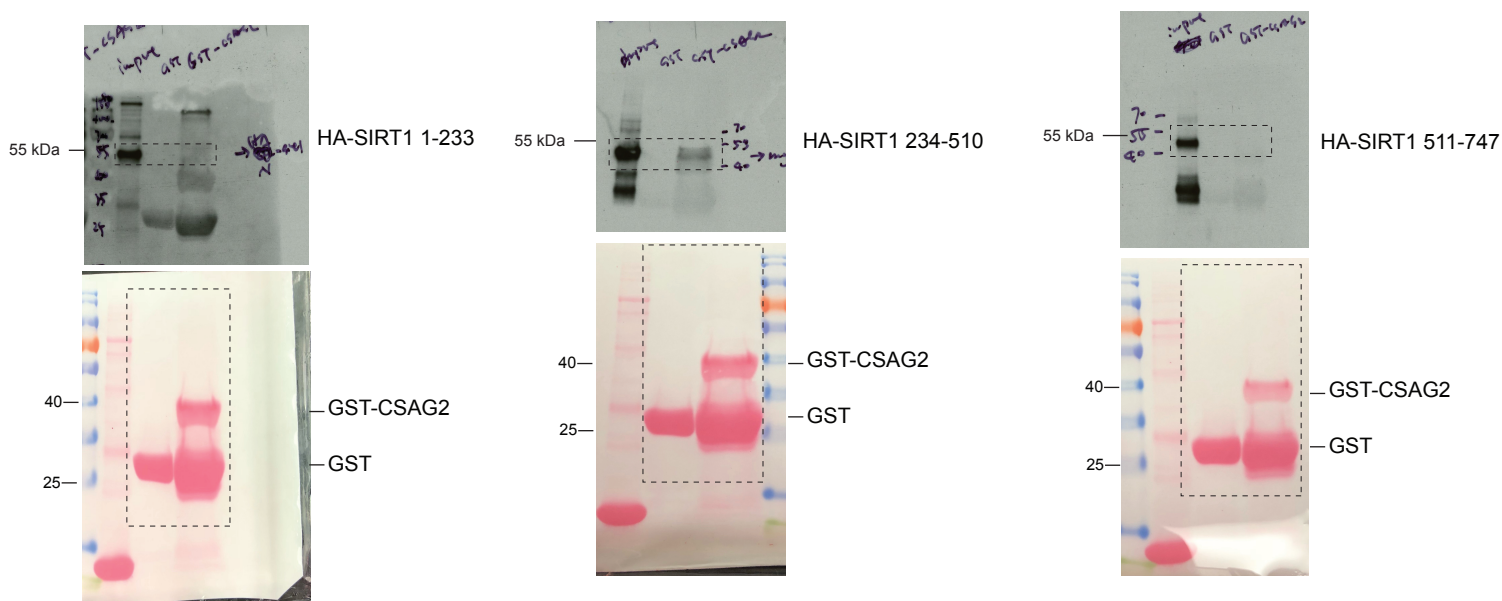

H

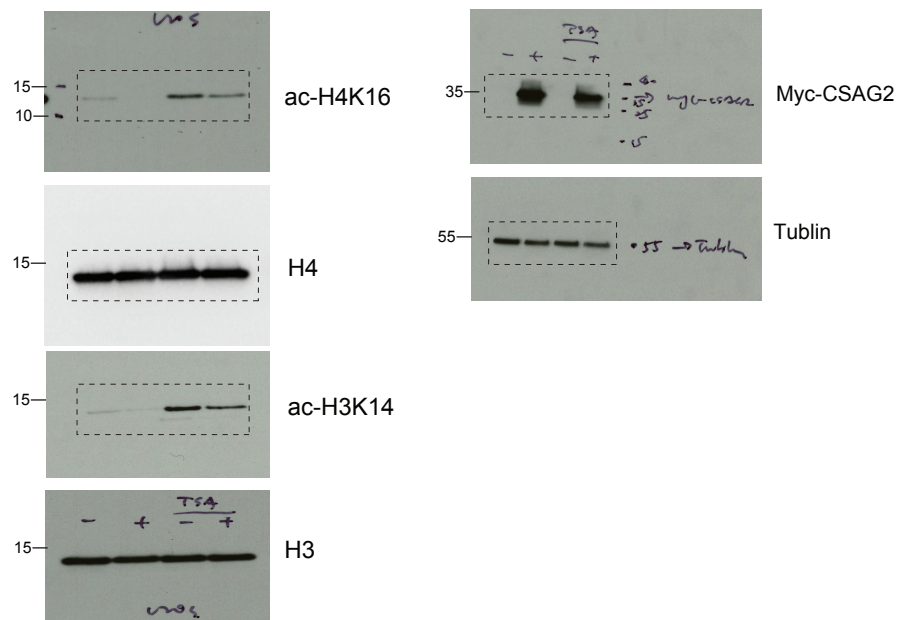

Supplement: EMBR-21-e50912-s006.pdf [file EMBR-21-e50912-s006.pdf]
